# Supplementary material
Source: PubMed Central journal article supplement (PMC3295331)
Supplement: bi201633j_si_001.pdf [file bi201633j_si_001.pdf]

**Supplementary Figure S1.**

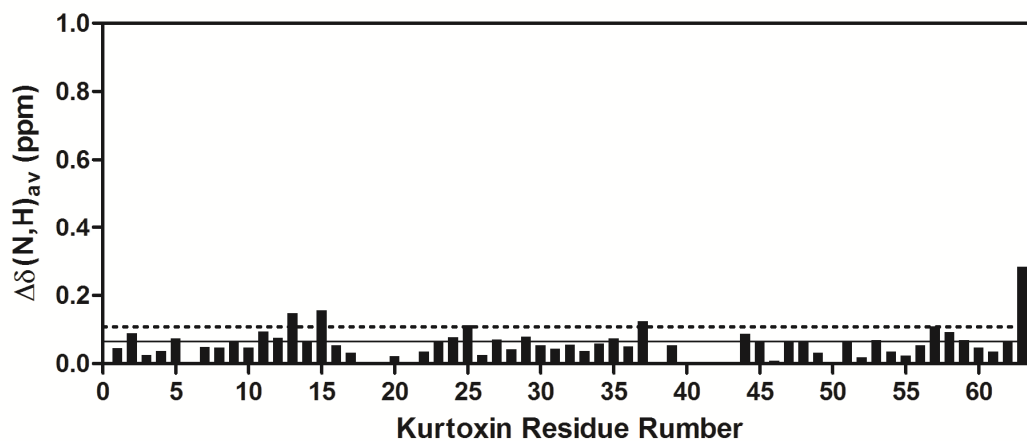

**Supplementary Fig. S1.** Histogram showing weighted average chemical shift changes ( $\Delta\delta(N,H)_{av} = [(\Delta\delta_{NH})^2 + (\Delta\delta_N/5)^2]^{1/2}$ ) for kurtoxin amide resonances between in presence and absence of  $CD_3CN$ . The solid and dotted lines indicate the average value (0.06) and average plus one standard deviation value (0.11) of all residues of kurtoxin, respectively.

## Supplementary Figure S2.

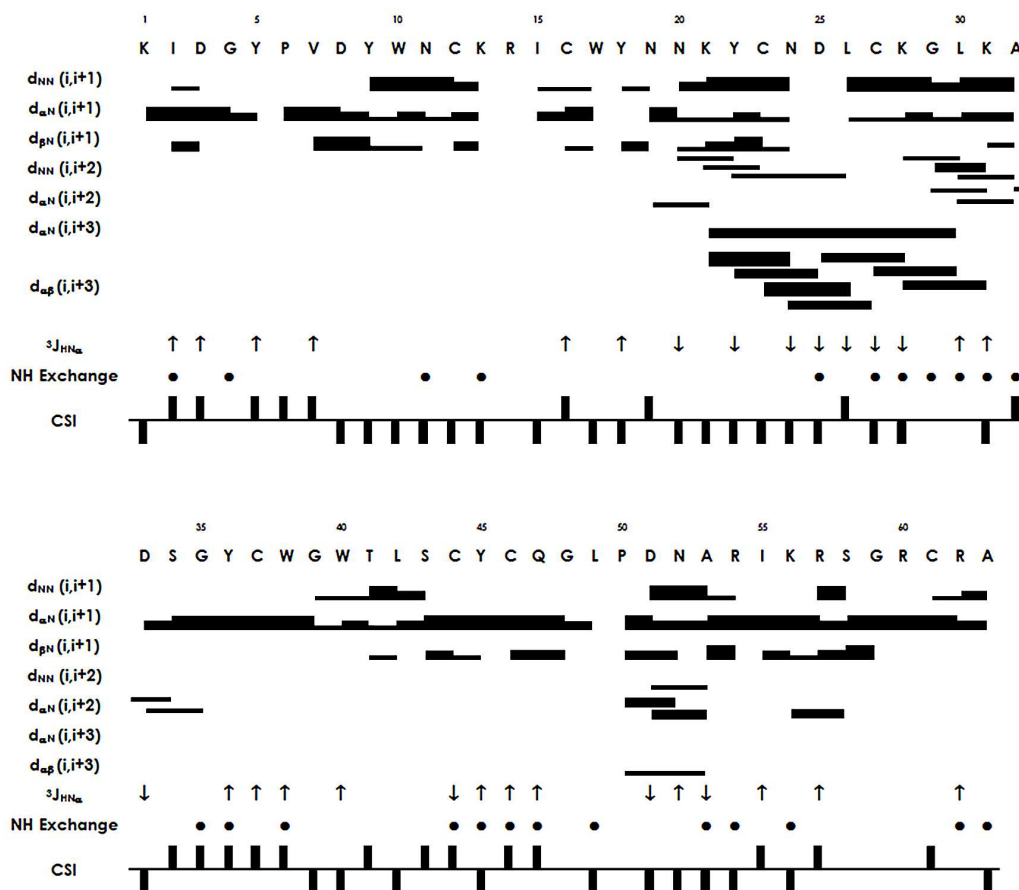

**Supplementary Fig. S2.** Summary of the sequential and medium range NOE connectivities,  $^3J_{NH-C\alpha H}$  coupling constants, and slowly exchanging backbone NH protons observed in kurtoxin. These structural parameters were used for sequence-specific assignments and for identification of secondary structural elements. The sequential and medium range NOEs  $d_{NN}$ ,  $d_{\alpha N}$ ,  $d_{\beta N}$ ,  $d_{NN}(i, i+2)$ ,  $d_{\alpha N}(i, i+2)$ ,  $d_{\alpha N}(i, i+3)$  and  $d_{\alpha\beta}(i, i+3)$  are indicated by bars between two residues. The classification of NOEs as strong, medium or weak is indicated by the height of the filled bars. Values of the  $^3J_{NH-C\alpha H}$  coupling constants are indicated by  $\uparrow$  ( $\geq 8$  Hz) and  $\downarrow$  ( $\leq 5.5$  Hz). Filled circles indicate backbone amide protons that were still observed in the TOCSY spectra after 25 h in  $D_2O$ . The chemical shift index is indicated by a ternary index with a value of -1, 0 or +1. Values of -1 and +1 indicate a shift deviation from the random-coil value of greater than 0.1 p.p.m. upfield and downfield, respectively; those within the range of the random-coil values are given a value of 0.

**Supplementary Figure S3.**

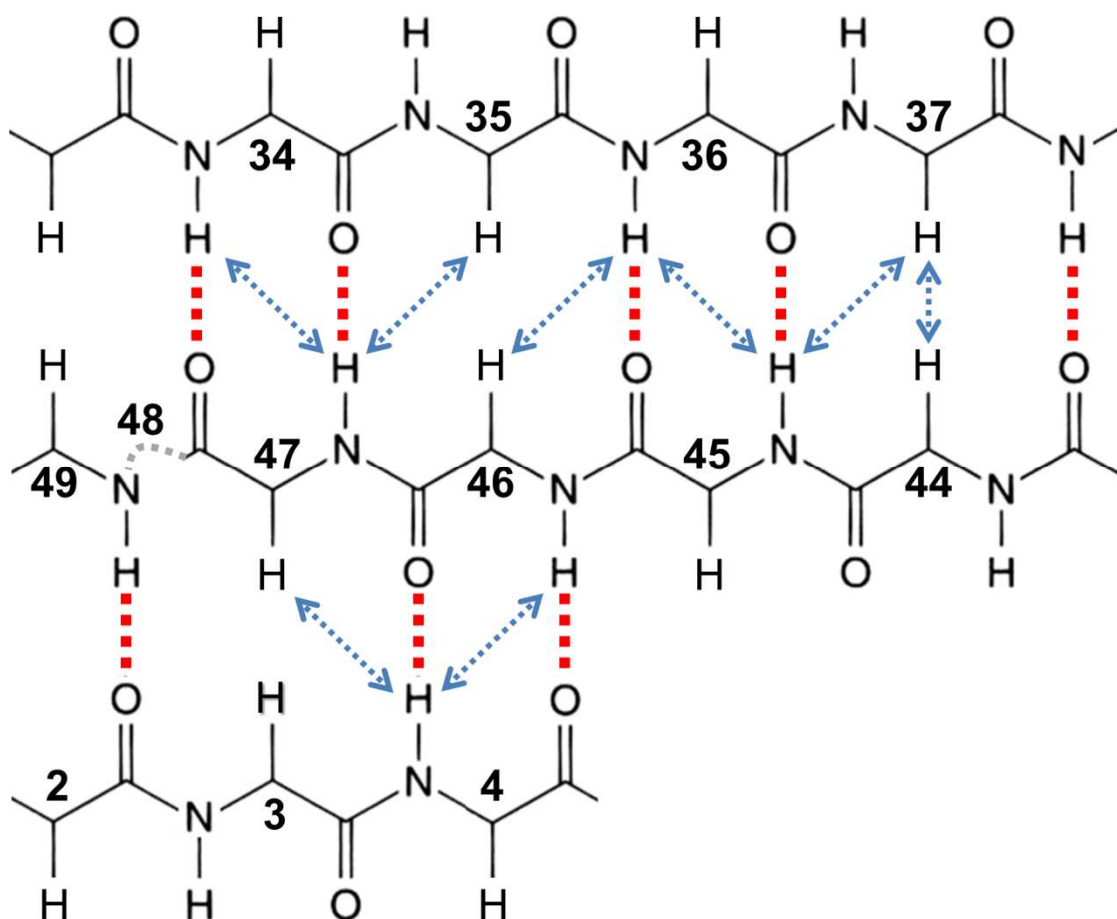

**Supplementary Fig. S3.** Schematic diagram of anti-parallel  $\beta$ -sheet structure of kurtoxin. Red dotted lines and blue dotted arrows indicate interstrand hydrogen bond and interstrand NOEs, respectively. The residues number is labeled on the C $\alpha$  atoms.
